# Supplementary material
Source: PubMed Central journal article supplement (PMC5632219)
Supplement: NIHMS908304-supplement-2.pdf [file NIHMS908304-supplement-2.pdf]

Supporting Information for “Interrogation of Side Chain Biases for Oligomannose Recognition in Antibody 2G12 via Structure-Guided Phage Display Libraries”

Tsung-Yi Lin<sup>§</sup> and Jonathan R. Lai<sup>§</sup>

<sup>§</sup> Department of Biochemistry, Albert Einstein College of Medicine, 1300 Morris Park Ave, Bronx, NY 10461, USA.

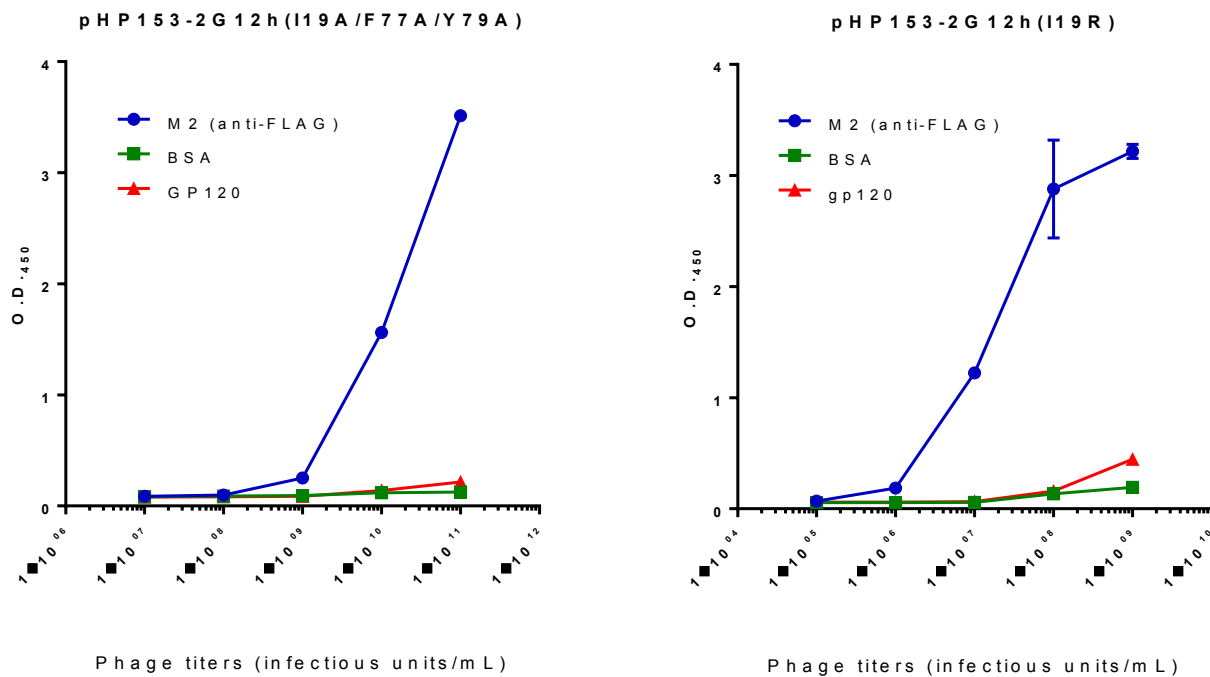

**Supplementary Figure 1: Phage ELISA of pHP153-2G12h(I19A/F77A/Y79A) and pHP153-2G12h(I19R).**

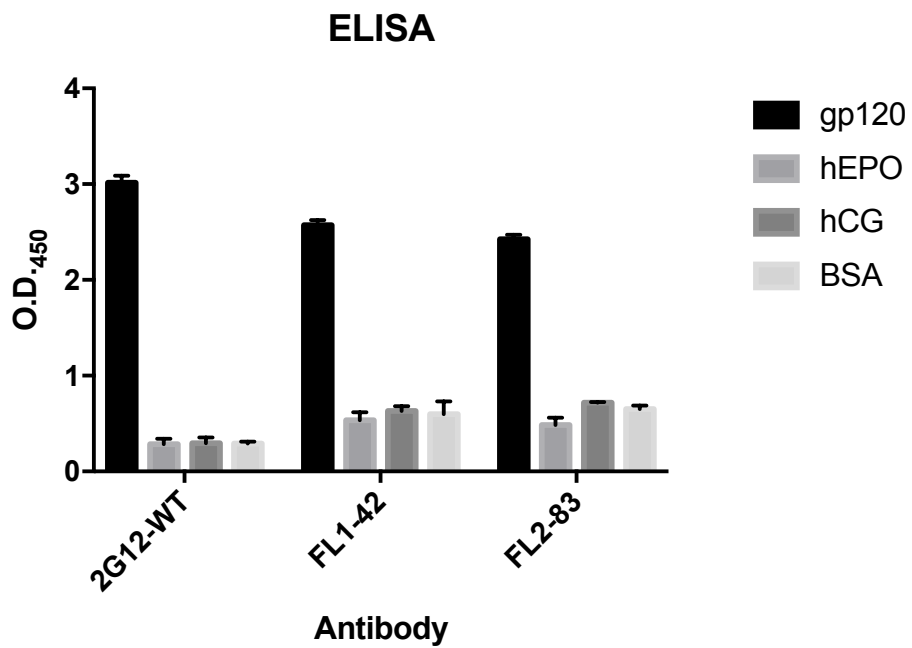

**Supplementary Figure 2:** ELISA of 2G12, FL1-42 and FL2-83 for binding to gp120, BSA, hEPO, and hCG. Antibody concentrations were  $\sim 7 \mu\text{M}$  for FL1-42 and FL2-83, and  $\sim 0.1 \mu\text{M}$  for 2G12.

**Supplementary Table 1 (next page):** Glycan mAbs used for contact analysis.

| Antibody name | Antigen target                                                                                                                                                                                        | Antigen class                             | PDB ID | reference                              |
|---------------|-------------------------------------------------------------------------------------------------------------------------------------------------------------------------------------------------------|-------------------------------------------|--------|----------------------------------------|
| 2G12          | Man9GlcNAc2                                                                                                                                                                                           | HIV-1 glycoprotein                        | 1OP5   | (Calarese et al. 2003)                 |
| PGT128        | V3 domain of GP120                                                                                                                                                                                    | HIV-1 glycoprotein                        | 3TYG   | (Pejchal et al. 2011)                  |
| PG9           | V1/V2 domain of GP120                                                                                                                                                                                 | HIV-1 glycoprotein                        | 3U4E   | (McLellan et al. 2011)                 |
| PG16          | V1/V2 domain of GP120                                                                                                                                                                                 | HIV-1 glycoprotein                        | 4DQO   | (Pancera et al. 2013)                  |
| PGT121        | Self N-glycan                                                                                                                                                                                         | HIV-1 glycoprotein                        | 4FQC   | (Mouquet et al. 2012)                  |
| PGT135        | GP120 core                                                                                                                                                                                            | HIV-1 glycoprotein                        | 4JM2   | (Kong et al. 2013)                     |
| SYA J-6       | Rha $\alpha$ 1,2Rha $\alpha$ 1,3Rha $\alpha$ 1,3GlcNAc $\alpha$ 1,2Rao                                                                                                                                | Internal epitopes of bacterial LPS        | 1M7I   | (Vyas et al. 2002)                     |
| Se155-4       | Abe $\alpha$ 1,3Mana $\alpha$ 1,4Rha $\alpha$ 1,3Gal                                                                                                                                                  | Internal epitopes of bacterial LPS        | 1MFC   | (Cygler et al. 1993)                   |
| F22-4         | $\rightarrow$ 2Rha $\alpha$ 1,2Rha $\alpha$ 1,3(Glc $\alpha$ 1,4)Rha $\alpha$ 1,3GlcNAc $\beta$ 1 $\rightarrow$                                                                                       | Internal epitopes of bacterial LPS        | 3BZ4   | (Vulliez-Le Normand et al. 2008)       |
| WN1 222-5     | GlcNAc1,2Glc $\alpha$ 1,2Glc $\alpha$ 1,3(Gal $\alpha$ 1,6)Glc $\alpha$ 1,3(Hep $\alpha$ 1,7)(P4)Hep $\alpha$ 1,3(P4)Hep $\alpha$ 1,5(Kdo $\alpha$ 2,4)Kdo $\alpha$ 2,6(P4)GlcN $\beta$ 1,6GlcNAc(1P) | Internal epitopes of bacterial LPS        | 3V0W   | (Gomery et al. 2012)                   |
| LPT3-1        | GlcNAc $\alpha$ 1,2Hep $\alpha$ 1,3(Glc $\beta$ 1,4)Hep $\alpha$ 1,5Kdo                                                                                                                               | Internal epitopes of bacterial LPS        | 4C83   | (Parker et al. 2014)                   |
| L363          | Mouse CD1d receptor and C20:2 $\alpha$ Gal ceramide                                                                                                                                                   | Sialic acid (glycolipid)                  | 3UBX   | (Yu et al. 2012)                       |
| mAb735        | $\alpha$ 2,8NeuAc (sialic acid) octamer                                                                                                                                                               | Sialic acid (homopolysaccharide epitopes) | 3WBD   | (Nagae et al. 2013)                    |
| CS-35         | Ara $\beta$ 1,2Ara $\alpha$ 1,5(Ara $\beta$ 1,2Ara $\alpha$ 1,3)Ara $\alpha$ 1,5Ara $\alpha$                                                                                                          | Terminal bacterial epitopes               | 3HNS   | (Murase et al. 2009)                   |
| S73-2         | Kdo2,8Kdo2,4Kdo                                                                                                                                                                                       | Terminal bacterial epitopes               | 3HZV   | (Brooks, Muller-Loennies, et al. 2010) |
| S54-10        | Kdo2,4Kdo2,4Kdo                                                                                                                                                                                       | Terminal bacterial epitopes               | 3I02   | (Brooks, Muller-Loennies, et al. 2010) |
| S67-27        | Kdo2,8-7-O-Me-Kdo                                                                                                                                                                                     | Terminal bacterial epitopes               | 3IKC   | (Brooks, Blackler, et al. 2010)        |
| S64-4         | Kdo2,8Kdo2,4Kdo2,6GlcN4P1,6GlcN1P                                                                                                                                                                     | Terminal bacterial epitopes               | 3PHO   | (Evans et al. 2011)                    |
| S25-2         | Kdo                                                                                                                                                                                                   | Terminal bacterial epitopes               | 3T4Y   | (Nguyen et al. 2003)                   |
| S25-26        | Kdo2,8Kdo2,4Kdo-O-allyl                                                                                                                                                                               | Terminal bacterial epitopes               | 4M7J   | (Haji-Ghassemi et al. 2014)            |
| chBR96        | Fuc $\alpha$ 1,2Gal $\beta$ 1,4(Fuc $\alpha$ 1,3)GlcNAc $\beta$ 1,3Gal (Le <sup>y</sup> )                                                                                                             | Tumour epitopes                           | 1CLY   | (Jeffrey et al. 1995)                  |
| hu3S193       | Fuc $\alpha$ 1,2Gal $\beta$ 1,4(Fuc $\alpha$ 1,3)GlcNAc $\beta$ 1,3Gal (Le <sup>y</sup> )                                                                                                             | Tumour epitopes                           | 1S3K   | (Ramsland et al. 2004)                 |
| 291_2G3-a     | Gal $\beta$ 1,4(Fuc $\alpha$ 1,3)GlcNAc $\beta$                                                                                                                                                       | Tumour epitopes                           | 1UZ8   | (van Roon et al. 2004)                 |

(Le<sup>x</sup>)

---

|        |                       |                 |      |                                    |
|--------|-----------------------|-----------------|------|------------------------------------|
| 237mAb | ERGT(GalNAc)KPPPLEELS | Tumour epitopes | 3IET | (Brooks, Schietinger, et al. 2010) |
|--------|-----------------------|-----------------|------|------------------------------------|

---
